# Supplementary figures and images for: A Cu-mediated one-pot Michael addition/α-arylation strategy using a diaryliodonium salt: a direct and efficient approach to α-aryl-β-substituted cyclic ketone scaffolds
Source: Royal Society of Chemistry journal article supplement (doi:10.1039/c5cc09837h), 2015-12-21

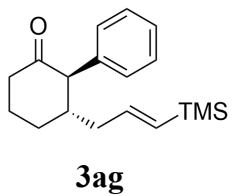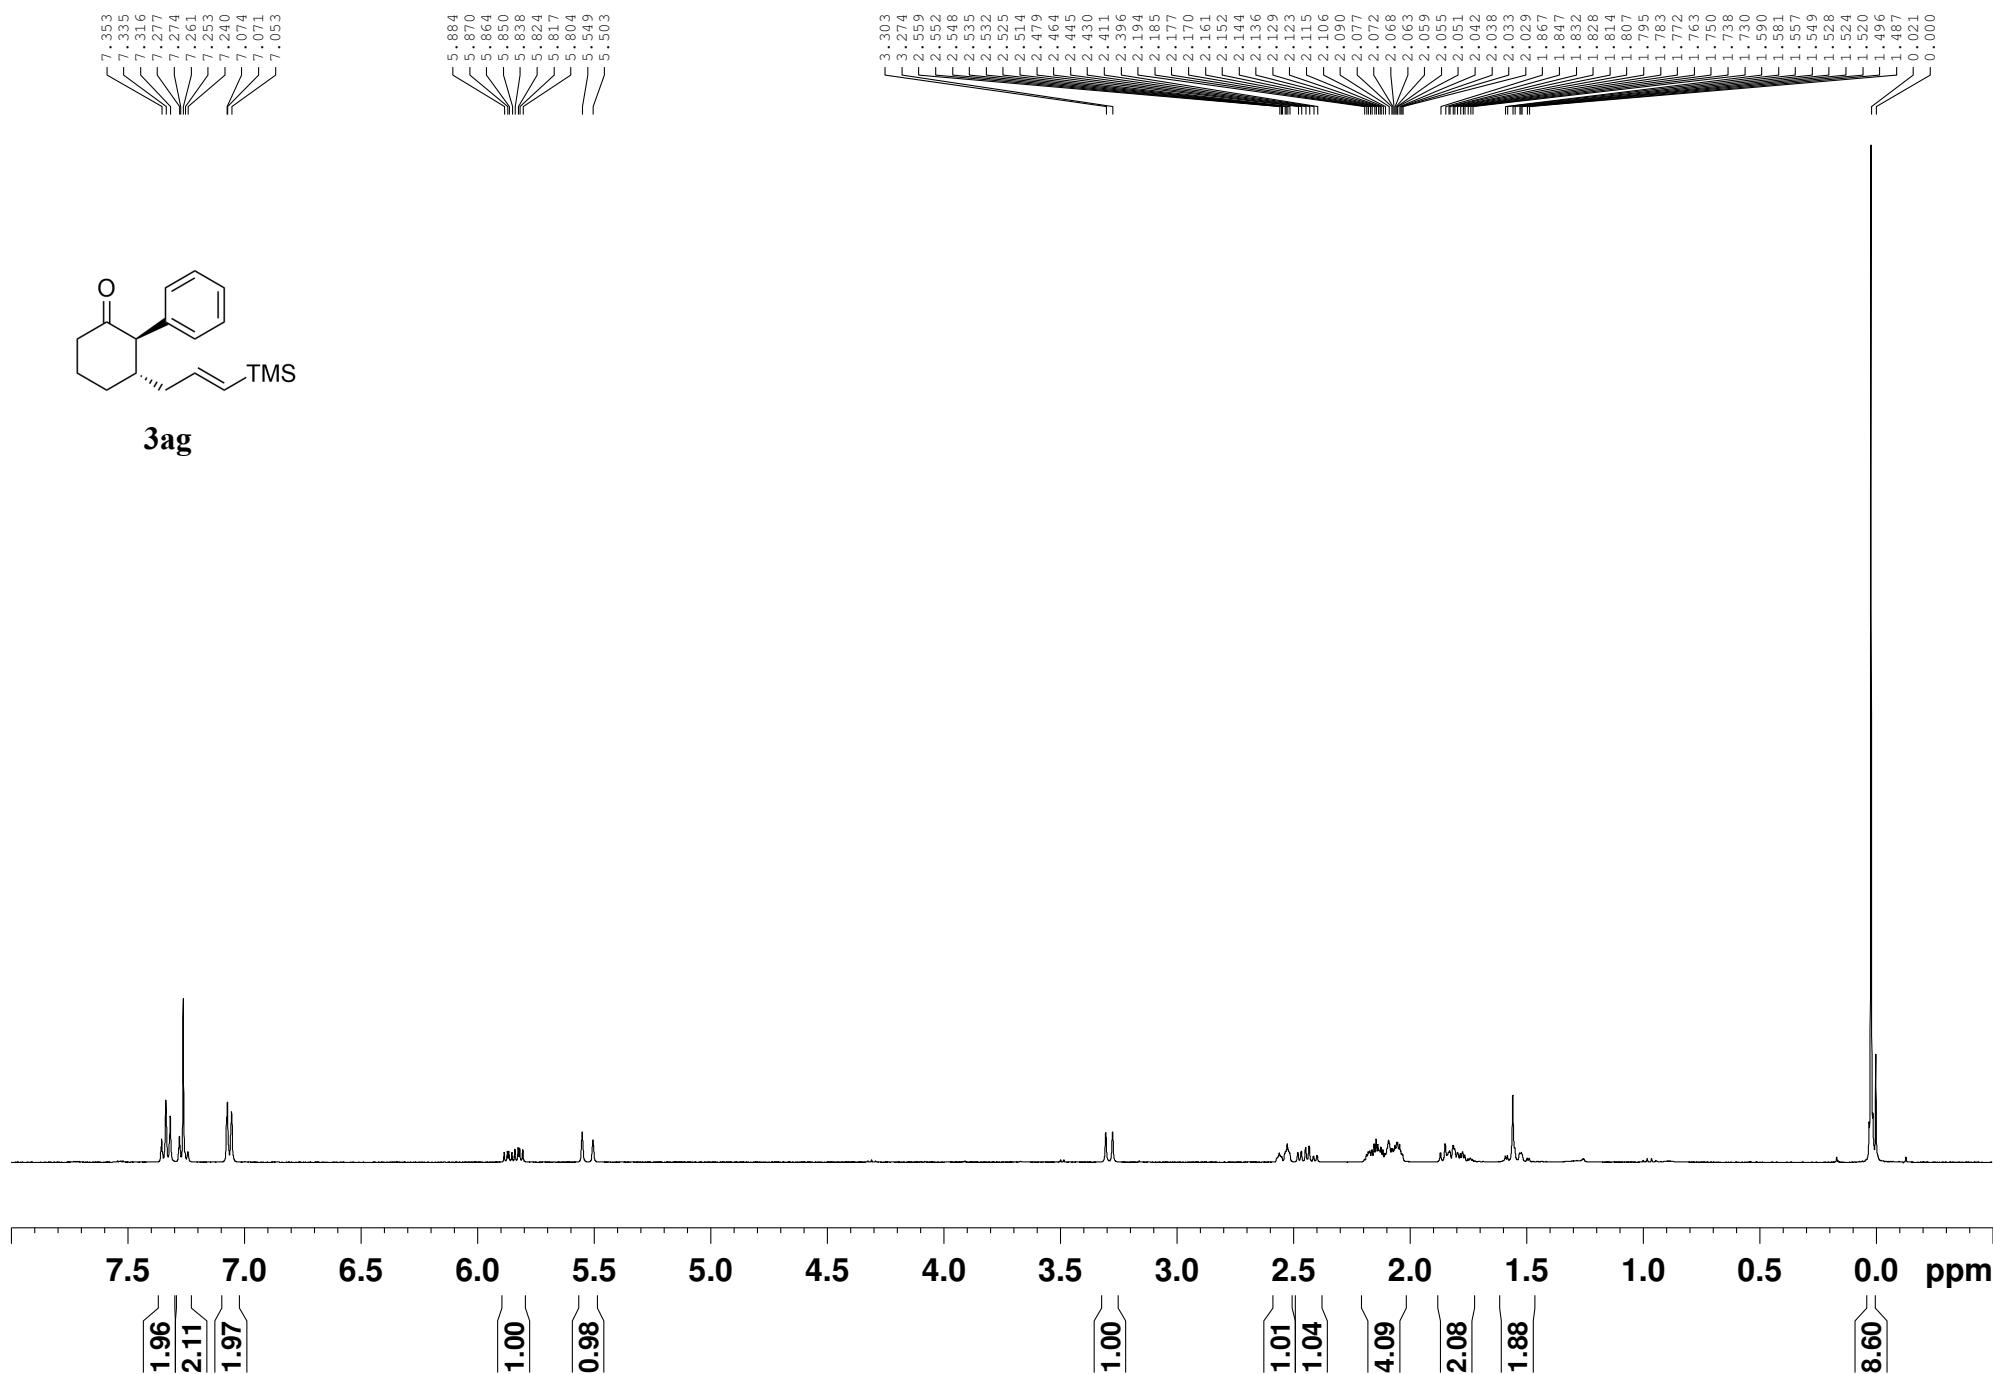

— 210.20

— 143.60

— 137.27

— 133.45

— 129.58

— 128.46

— 127.09

— 77.48

— 77.16

— 76.84

— 63.38

— 44.88

— 42.15

— 42.11

— 30.94

— 25.90

— -1.07

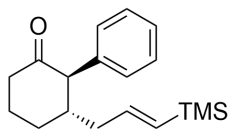

**3ag**

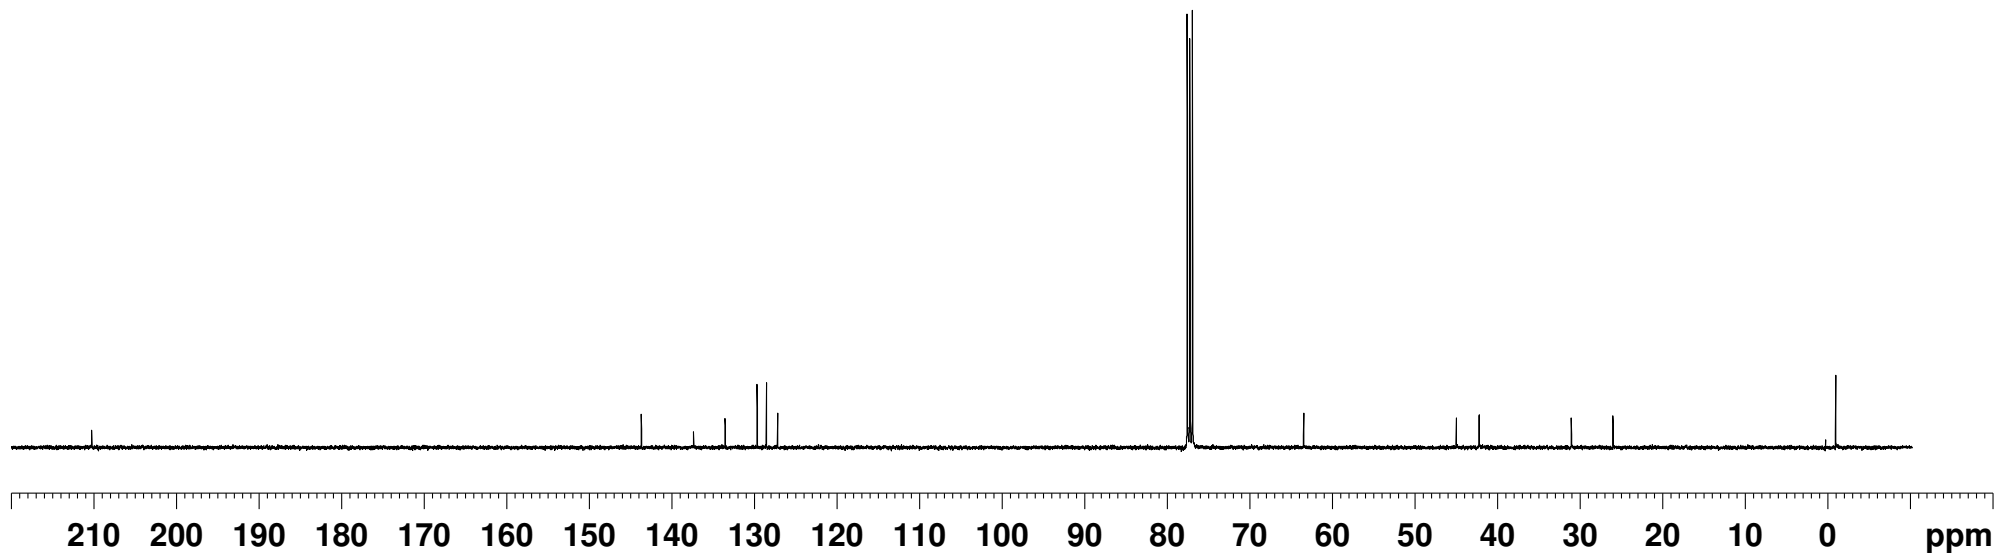

Supplement: c5cc09837h1.pdf [file c5cc09837h1.pdf]

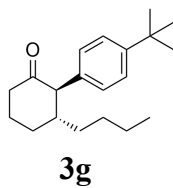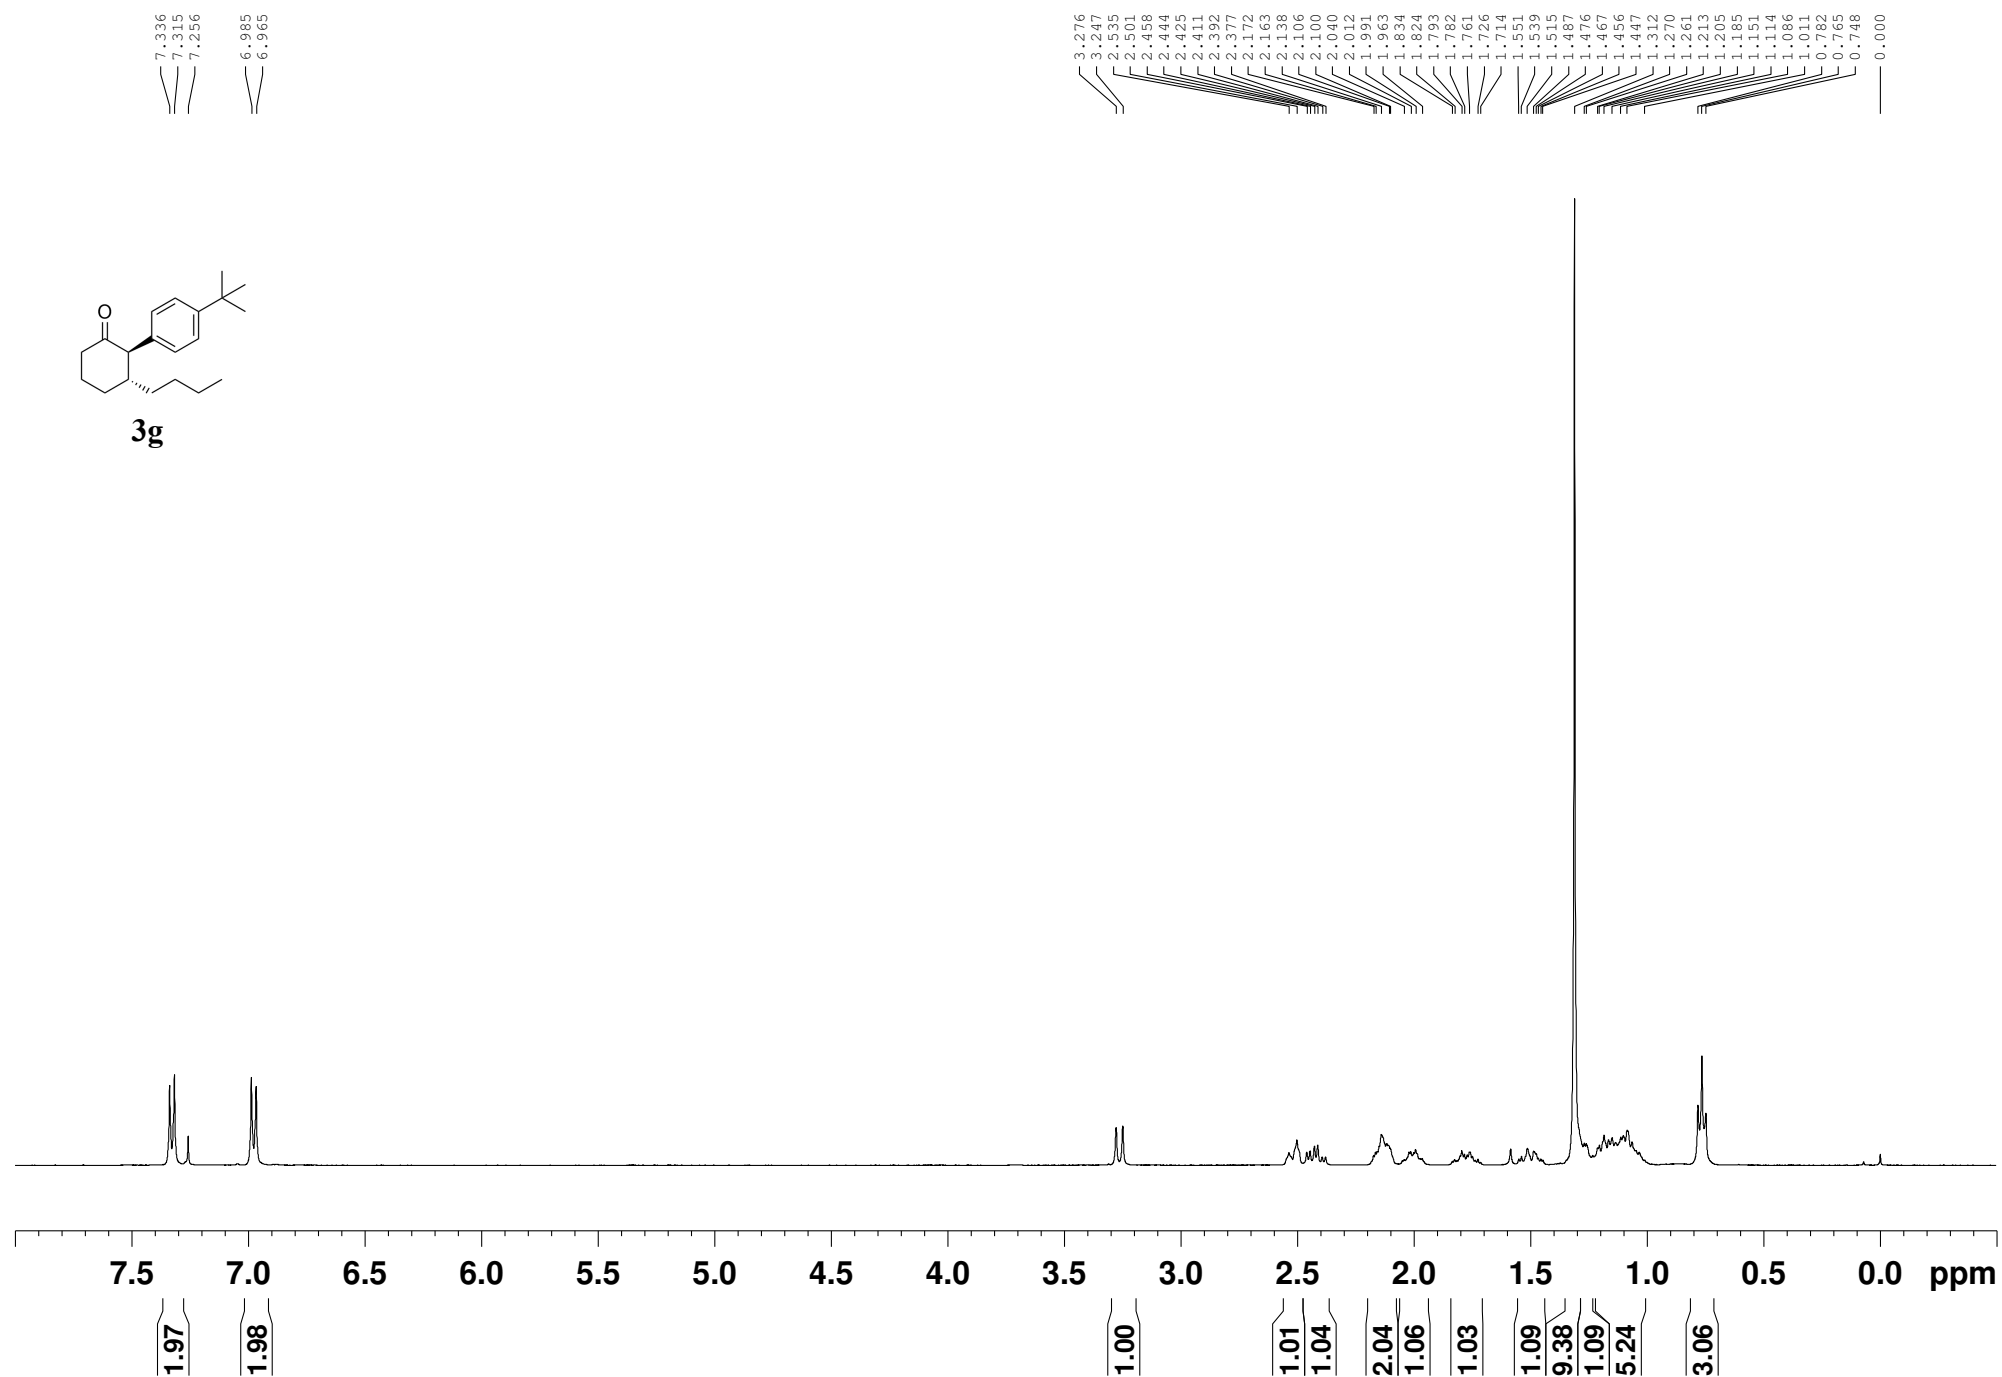

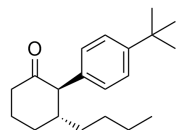

**3g**

— 210.85

— 149.39

— 134.37

— 128.93

— 125.27

77.48  
77.16  
76.84

— 63.29

— 44.94

— 42.10

34.53

34.32

31.51

30.77

28.67

26.00

22.73

— 14.08

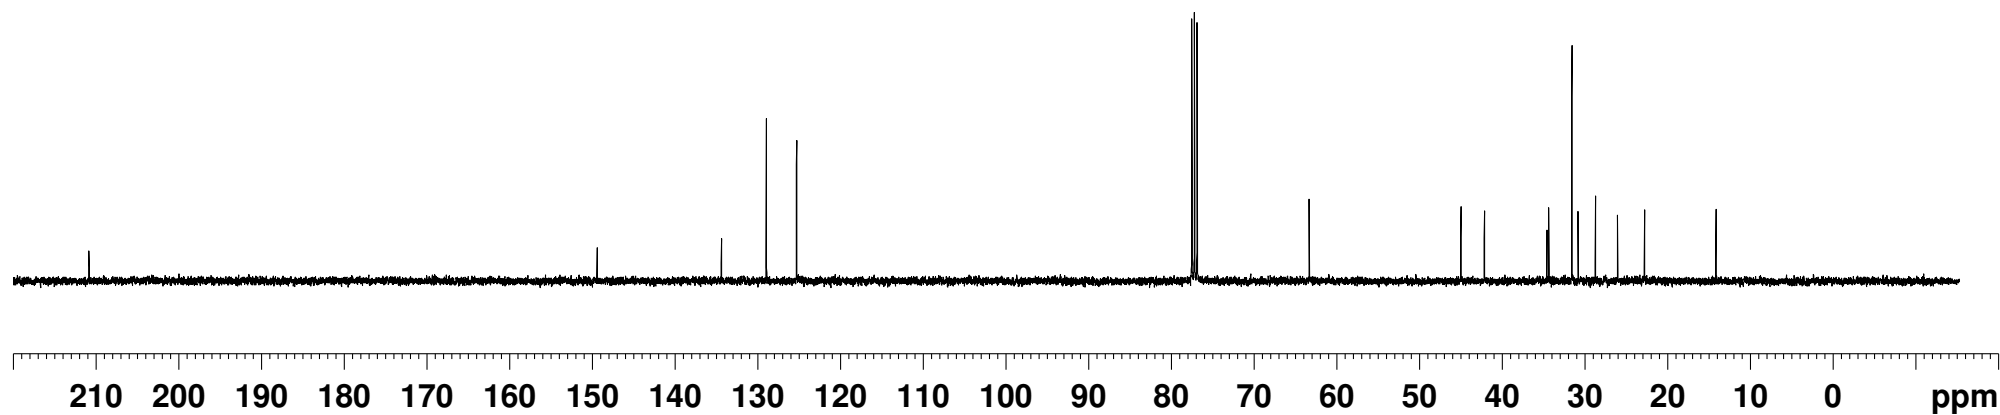

Supplement: c5cc09837h2.pdf [file c5cc09837h2.pdf]
